# Supplementary material for: Variation of sensitivity of Trypanosoma evansi isolates from Isiolo and Marsabit counties of Kenya to locally available trypanocidal drugs
Source: PubMed Central journal article supplement (PMC9894490; doi:10.1371/journal.pone.0281180), 2023-02-02
Supplement: pone.0281180.s001.pdf [file pone.0281180.s001.pdf]

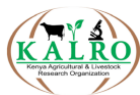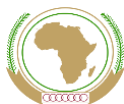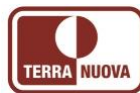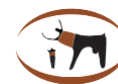

Assigned household number [\_\_\_\_\_]

## Intensifying Camel Productivity through Integrated Control of *Surra* within the Somali ecosystem of the Horn of Africa

### Questionnaire Identification

|                                                    |                                                                                                                                                                                                                                         |
|----------------------------------------------------|-----------------------------------------------------------------------------------------------------------------------------------------------------------------------------------------------------------------------------------------|
| ID1. Date of interview (dd/mm/yy)                  | ___ ___ / ___ ___ / 2018                                                                                                                                                                                                                |
| ID2. Settlement/Village                            | <ol style="list-style-type: none"> <li>1. Gambella</li> <li>2. Kina/Kulamawe</li> <li>3. Laisamis</li> <li>4. LMD/Mlango</li> <li>5. Loglogo</li> <li>6. Ngaremara</li> <li>7. Turbi/Bubisa</li> <li>8. Oldonyiro</li> </ol><br>[_____] |
| ID3. GPS readings                                  | N _____<br>E _____                                                                                                                                                                                                                      |
| ID4. Sub-County                                    | <ol style="list-style-type: none"> <li>1. Isiolo</li> <li>2. Garbatula</li> <li>3. Merti</li> <li>4. North Horr</li> <li>5. Maikona</li> <li>6. Laisamis</li> </ol><br>[_____]                                                          |
| ID5. County                                        | <ol style="list-style-type: none"> <li>1. Isiolo</li> <li>2. Marsabit</li> </ol>                                                                                                                                                        |
| ID6. Name of interviewer                           | _____                                                                                                                                                                                                                                   |
| ID7. Contact address for interviewer               | Tel. No. _____<br>email address _____                                                                                                                                                                                                   |
| ID8. Name of Respondent and Ethnic group           | <ol style="list-style-type: none"> <li>1. Name [_____]</li> <li>2. Ethnic group [_____]</li> </ol>                                                                                                                                      |
| ID9. Gender of Respondent                          | <ol style="list-style-type: none"> <li>1. Male</li> <li>2. Female [_____]</li> </ol>                                                                                                                                                    |
| ID10. Relationship of respondent to household head | <ol style="list-style-type: none"> <li>1. Household head</li> <li>2. Spouse</li> <li>3. Son</li> <li>4. Daughter</li> <li>5. Other (Specify.....)</li> </ol><br>[_____]                                                                 |
| ID11. Filled questionnaire checked by?             |                                                                                                                                                                                                                                         |

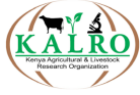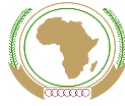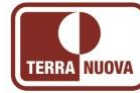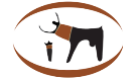**A. Personal profile of the camel producer**

- A.1 Name of household head \_\_\_\_\_
- A.2 Gender of household head: 1. Male [\_\_\_\_\_] 2. Female [\_\_\_\_\_] \_\_\_\_\_
- A.3 Age of household head [\_\_\_\_\_] (years)
- A.4 Years of formal education of household head [\_\_\_\_\_] \_\_\_\_\_
- A.5 Main occupation of the household head [\_\_\_\_\_] \_\_\_\_\_  
 1= Livestock keeping 2= Formal employment 3=informal employment 4= Business 5= Student  
 6= (specify).....
- A.6 When did the household head start keeping camels? [\_\_\_\_\_] (Year)
- A.7 (a) What is the form of ownership of the land you mainly use for livestock rearing? [\_\_\_\_\_] \_\_\_\_\_  
 1= Privately owned 2= Rented 3= Communally owned 4= Other forms of ownership  
 (specify).....
- (b). If land is privately owned or rented, what is the number of hectares?  
 Rented [\_\_\_\_\_] hectares Private [\_\_\_\_\_] hectares

**B. Information on herd of camels kept and ownership**

- B.1 Please indicate the current number of camels in your herd and who they belong to?

| Type                              | Number | Owner (Indicate in order of importance based on proportion owned) |
|-----------------------------------|--------|-------------------------------------------------------------------|
| B.1.1 Calves (less than a year)   |        | [____][____][____][____](codes)                                   |
| B.1.2 Young female (pre-breeding) |        | [____][____][____][____](codes)                                   |
| B.1.2 Young male (pre-breeding)   |        | [____][____][____][____](codes)                                   |
| B.1.3 Adult female (breeding age) |        | [____][____][____][____](codes)                                   |
| Lactating females                 |        | [____][____][____][____](codes)                                   |
| B.1.4 Males (entire)              |        | [____][____][____][____](codes)                                   |
| B.1.5 Males (castrated)           |        | [____][____][____][____](codes)                                   |
| B.1.6 Total                       |        | [____][____][____][____](codes)                                   |

**Codes**

| Owner                                  |                          |
|----------------------------------------|--------------------------|
| 1=Household head                       | 5=Female child           |
| 2=Spouse                               | 6= Relatives             |
| 3=Jointly by household head and spouse | 7= Neighbours            |
| 4=Male child                           | 8=Business partners      |
|                                        | 9=Others (specify) _____ |

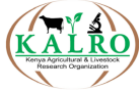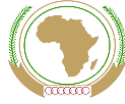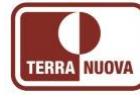

### C Camel husbandry practices

C.1 What type of production systems do you practice? [\_\_\_\_\_]

- 1= Agro-pastoralism (settled with cropping activities and movement of livestock out of homestead for several days)
- 2= Mixed crop/livestock (permanently settled, animals move out and return to homestead every day)
- 3= Semi Nomadic (settled with movement of livestock only over several days)
- 4= Fully –nomadic (household moves with animals)
- 5= Others (specify.....)

C.2 Who plays the following roles or makes the following decisions about camel production in your household?

| Decision/Role                                                                                                                                                             | <u>List 3 most important in order of importance</u><br>1= The Household head<br>2= The spouse in Household<br>3= Jointly in Household<br>4= Male children in Household<br>5= Female children in Household<br>6= Employed herder in household<br>7= Jointly with others (fora)<br>8= Other community members – specify |
|---------------------------------------------------------------------------------------------------------------------------------------------------------------------------|-----------------------------------------------------------------------------------------------------------------------------------------------------------------------------------------------------------------------------------------------------------------------------------------------------------------------|
| Who mainly contributes the labour for grazing the camels?                                                                                                                 | [ ][ ][ ]codes                                                                                                                                                                                                                                                                                                        |
| Who contributes labour to milking the lactating camels?                                                                                                                   | [ ][ ][ ]codes                                                                                                                                                                                                                                                                                                        |
| During milking, who makes the decision on the number of quarters to milk?                                                                                                 | [ ][ ][ ]codes                                                                                                                                                                                                                                                                                                        |
| Who decides about sales or purchases of your camels?                                                                                                                      | [ ][ ][ ]codes                                                                                                                                                                                                                                                                                                        |
| When your camel falls sick who decides;<br>i) Whether to treat the camel?<br>ii) The type of treatment to give (conventional or traditional)<br>iii) Type of drugs to buy | [ ][ ][ ]codes<br>[ ][ ][ ]codes<br>[ ][ ][ ]codes                                                                                                                                                                                                                                                                    |
| Who treats sick camels in your herd?                                                                                                                                      | [ ][ ][ ]codes                                                                                                                                                                                                                                                                                                        |
| Who decides where to graze the camels?                                                                                                                                    | [ ][ ][ ]codes                                                                                                                                                                                                                                                                                                        |
| Who decides when to migrate to new grazing areas?                                                                                                                         | [ ][ ][ ]codes                                                                                                                                                                                                                                                                                                        |
| <b>List other important roles</b> , Specify:                                                                                                                              | [ ][ ][ ]codes                                                                                                                                                                                                                                                                                                        |
|                                                                                                                                                                           | [ ][ ][ ]codes                                                                                                                                                                                                                                                                                                        |
|                                                                                                                                                                           | [ ][ ][ ]codes                                                                                                                                                                                                                                                                                                        |

C.3 (i). Do you provide supplementary feeds to your camels apart from grazing? [\_\_\_\_\_]

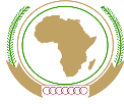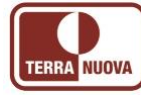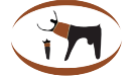

1. Yes[\_\_\_\_\_] 2. No[\_\_\_\_\_]

(i) If YES above, what are these supplementary feeds – ***insert codes for all*** [\_\_\_\_\_] [\_\_\_\_\_] [\_\_\_\_\_]

- 1= Pastures
- 2= Fodder
- 3= Mineral salts
- 4= Feeds
- 5= others, specify \_\_\_\_\_

(ii) From where do you get the supplementary feeds? (***give name(s)***)

---



---



---

C.4.(i) On average, on a good day, how much milk in litres do you milk from your herd?

[\_\_\_\_\_ litres/day]

(ii) How many litres of milk does your best camel produce per milking session?

[\_\_\_\_\_ litres]

(iii) More often than not, how many **quarters** of the **camel's udder** do you milk? [\_\_\_\_\_]

(iv) More often than not, how many times do you milk your camels in a day? [\_\_\_\_\_]times/day

(v) Do you sell milk you get from your camel herd? 1. Yes[\_\_\_\_\_] 2. No [\_\_\_\_\_]

(vi) (a) If **YES above**, how many litres of milk do you sell? [\_\_\_\_\_]litre(s)]

(b) What is the price per litre? [Kshs\_\_\_\_\_/litre]

(vi) Where do you sell your milk?

- 1. Neighbours, 2. Brokers/middlemen 3. Market 4. Dairy 5. Others, specify.....

(vii) If milk is sold, how far is the selling point from your household?

Name of place [\_\_\_\_\_];

Distance [\_\_\_\_\_ km]

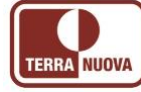

C.5. Apart from rearing camels, what other livestock species do you keep and which household member actually owns the animals?

| Animal species              | Number of animals kept | Who owns the animals? |
|-----------------------------|------------------------|-----------------------|
| B.4.a Cattle                | [_____]                | [_____](code)         |
| B.4.b sheep & goats         | [_____]                | [_____](code)         |
| B.4.c Donkeys               | [_____]                | [_____](code)         |
| B.4.d Chicken               | [_____]                | [_____](code)         |
| B.4.e Others (specify)_____ | [_____]                | [_____](code)         |

**Codes**

| Owner                                |                           |
|--------------------------------------|---------------------------|
| 1=Male household head                | 6=Female child            |
| 2=Female household head              | 7=Relatives               |
| 3=Male household head and his spouse | 8= Neighbours             |
| 4=Female spouse                      | 9=Business partners       |
| 5=Male child                         | 10=Others (specify) _____ |

C.6. (i) Do you graze your camels separately from your other livestock 1. Yes[\_\_\_\_\_] 2. No[\_\_\_\_\_]

If **YES**, why do you separate your camels from other species of livestock? List reasons below:

---



---



---

(ii) If **No**, which other livestock do you graze alongside your camels? [\_\_\_\_\_] [\_\_\_\_\_] [\_\_\_\_\_]

- 1=Goats      2=Sheep      3=Cattle      4=Donkeys



C.7. (i) Do you split your camels into different herds? 1. Yes[ ] 2. No[ ]

What is the basis of splitting the herd? (Age, Sex, Productivity etc)

Three horizontal lines for writing the basis of splitting the herd.

(ii) If Yes in C.7 (i) above what camel classes are grouped together – (use codes below).

Group 1 – [ ][ ][ ]

Group 2 – [ ][ ][ ]

Group 3 – [ ][ ][ ]

Group 4 – [ ][ ][ ]

Group 5 – [ ][ ][ ]

**Codes**

- 1 = Calves (less than one year)
- 2 = Young female (pre-breeding)
- 3 = Young male (pre-breeding)
- 4 = Adult female (breeding age)
- 5= Lactating animals
- 6 = Males (entire)
- 7 = Males (castrated)
- 8= Other

C.8. Where do you graze the following classes of camels?

| Class of camel                 | Most utilized grazing areas |               | Reasons |
|--------------------------------|-----------------------------|---------------|---------|
|                                | In wet season               | In dry season |         |
| 1= Calves (less than one year) |                             |               |         |
| 2= Young female (pre-breeding) |                             |               |         |
| 3= Adult female (breeding age) |                             |               |         |
| 4= Lactating animals           |                             |               |         |
| 5= Males (entire)              |                             |               |         |
| 6= Males (castrated)           |                             |               |         |

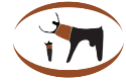

C.8.(i) Other than livestock keeping, do any of your household members have other sources of income?

1. Yes[ ] 2. No[ ]

(ii) If **YES** in (i),What are these other sources of income? (Indicate all that apply) [ ]

- 1=Farming
- 2=Formal employment
- 3=Informal employment
- 4=Business
- 5=Others (specify)\_\_\_\_\_

(iii) Please rank important economic activities that generate income for the household

| Activity                               | Rank |
|----------------------------------------|------|
| Camel keeping                          | [ ]  |
| Other livestock species (specify)..... | [ ]  |
| Farming i.e. crop production           | [ ]  |
| Formal Employment                      | [ ]  |
| Informal employment                    | [ ]  |
| Business                               | [ ]  |
| Others (specify)_____                  | [ ]  |
|                                        |      |

**D. Knowledge of camel trypanosomiasis and its management**

D.1. What diseases affect camels in this area? (Respondents should be allowed to give local names)

---



---



---



---



---

D.2. (If trypanosomiasis is listed) how do you know that an animal is infected by trypanosomiasis? (Your observation to conclude that a camel is infected with trypanosomiasis)? Tick, √ if mentioned

1. Loses body condition[ ]
2. Develops a drooping hump [ ]
3. Unable to walk long distances [ ]
4. Sits down frequently
5. The camel develops swellings on the feet, underbelly and eyelids [ ]
6. The hair coat becomes rough [ ]
7. Produces a lot of saliva and tears
8. Shivers as if feeling cold [ ]



- 9. Does not feed well [ \_\_\_\_\_ ]
- 10. Diarrhoeas [ \_\_\_\_\_ ]
- 11. Produces less milk
- 12. Aborts if pregnant [ \_\_\_\_\_ ]
- 13. Others, specify \_\_\_\_\_
- 14. \_\_\_\_\_
- 15. \_\_\_\_\_
- 16. \_\_\_\_\_
- 17. \_\_\_\_\_
- 18. \_\_\_\_\_

D.3. what causes trypanosomiasis in camels? [ \_\_\_\_\_ ]

1= Tsetse fly      2= Biting Fly      3= Ticks      4= Mosquitoes      5= others (Specify).....

D.4. (If tsetse fly and biting flies are mentioned in D3 above). When do you experience a heavy presence of the flies in your camel herd? [ \_\_\_\_\_ ]

1= Rainy season    2 = Dry season    3= immediately after rainy season  
4 = All seasons    5 = Other (Specify).....

D.5 How do you control the flies that cause camel trypanosomiasis? [ \_\_\_\_\_ ]

1= Acaricide application      2= Avoid infested areas      3= Do nothing  
4= Other (Specify).....

D.6.(i) When did you last experience a case of camel trypanosomiasis in your camel herd (give month and year )

[month \_\_\_\_\_ year \_\_\_\_\_]

(ii) Which class (es) of animal in the herd was affected in this last case mentioned above (use codes)  
[ \_\_\_\_\_ ]

**Codes**

- 1 = Calves (less than one year)
- 2 = Young female (pre-breeding)
- 3 = Young male (pre-breeding)
- 4 = Adult female (breeding age)
- 5 = Males (entire)
- 6 = Males (castrated)





(iii). Did you treat the animal(s)?

1. Yes[ ] 2. No[ ]

(iv). IF YES, after how long did you take before you treated the camel after realising that it was sick? Give number of days - [ ]

(v) What did you use to treat the animal?

1= Conventional drugs [ ]

2= herbal concoction [ ]

3= others [ ]

If conventional drugs used,

(vi) Which drug did you use? **give name or names if drugs were mixed**

\_\_\_\_\_  
\_\_\_\_\_

D.7 How did you prepare the drugs for administration and how did you administer it?

- **Indicate Quantity of drug/s used**
- **Indicate volume of water used**
- **Indicate the mode of delivery- intravenous injection, muscle injection or oral**

\_\_\_\_\_  
\_\_\_\_\_  
\_\_\_\_\_

D.8 What was the outcome after administering the treatment? [ ]

1= Camel recovered fully 2= Camel did not recover and died

3=Other (specify).....

D.9. More often than not, which classes of camels in your herd are most affected by trypanosomiasis. (List in

order of those mostly affected) [ ][ ][ ][ ] (codes)

**Codes for class**

- 1 = Calves (less than one year)
- 2 = Young female (pre-breeding)
- 3 = Young male (pre-breeding)
- 4 = Adult female (breeding age)
- 5 = Males (entire)
- 6 = Males (castrated)

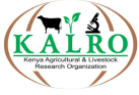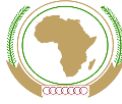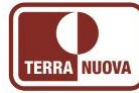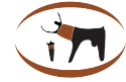

D.10 During treatment of trypanosomiasis in camels, do you normally mix different types of drugs together?

- 1. Yes[\_\_\_\_\_]
- 2. No[\_\_\_\_\_]

D.11. If YES which drugs do you mix and why?

---



---



---

D.12 How many times do you treat the sick camel for it to recover? [\_\_\_\_\_]

- 1= Once only
- 2.= twice only
- 3= Three times only
- 4= Others (specify).....

D.13 Do you think that available drugs are effective against trypanosomiasis in camels?

- 1. Yes[\_\_\_\_\_]
- 2. No[\_\_\_\_\_]

D.14 If **NOT**, what do you think is the reason(s)?

---



---



---

D.15 What do you **Mainly** do to prevent your animals from trypanosomiasis? [\_\_\_\_\_][\_\_\_\_\_]

- 1. = Spraying animals with suitable acaricide (**Name the acaricide** ).....)
- 2. = Avoiding vector infested areas
- 3. = Injecting them with preventive drugs
- 4. = Others, (Specify).....

D.16 Where do you **MAINLY** get your veterinary drugs from? (List in order of importance)

[\_\_\_\_\_][\_\_\_\_\_][\_\_\_\_\_][\_\_\_\_\_]

- 1. Agrovets (duka)
- 2. From open market, during market days
- 3. Hawkers on the streets
- 4. Drug companies
- 5. Government Veterinary Officer
- 6. Private vets.
- 7. Other (Specify).....

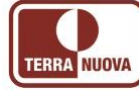

D.17 (i) Is this where you obtained the drug you used to treat your last case of trypanosomiasis in your herd? [\_\_\_\_\_]

1. Yes [\_\_\_\_\_] 2. No [\_\_\_\_\_]

ii) Are drugs that you use to treat trypanosomiasis always available in the outlet whenever you need them?

1. Yes [\_\_\_\_\_] 2. No [\_\_\_\_\_]

iii) What do you do when you fail to get the drugs you are looking for in the outlet?

\_\_\_\_\_  
\_\_\_\_\_

D.18 More often than not, who treats your sick animals? [\_\_\_\_\_][\_\_\_\_\_]

1= Government Veterinary officers      2= Animal Health Workers  
3= Self    4. Herders      5= Others (Specify).....

D.19 (If farmer treats animals by himself ask ), Do you normally experience any problems when treating your sick animals

1. Yes [\_\_\_\_\_] 2. No [\_\_\_\_\_]

D.20 If YES, What are the common problems encountered

\_\_\_\_\_  
\_\_\_\_\_

D.21 (If not mentioned above) Is ethno-medicine used in treatment of camel trypanosomiasis in this community?

1. Yes [\_\_\_\_\_] 2. No [\_\_\_\_\_]

D.22. If yes please give the ethno medical materials/plants used in the treatment of *trypanosomiasis*

| Name of ethno medicinal drug/plant | Number of times drug used in last 12 months | Mains sources of the drug/substances | Do animals recover when drug is used | How do you prepare the drug before administering |
|------------------------------------|---------------------------------------------|--------------------------------------|--------------------------------------|--------------------------------------------------|
|                                    |                                             |                                      |                                      |                                                  |
|                                    |                                             |                                      |                                      |                                                  |
|                                    |                                             |                                      |                                      |                                                  |
|                                    |                                             |                                      |                                      |                                                  |

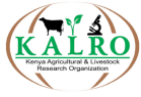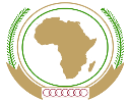

**E. Details on camel Sales**

E.1 Have you sold any camels during the last ONE year?

1. Yes[\_\_\_\_\_] 2. No[\_\_\_\_\_]

E.2 If yes above, how many camels did you sell .....

E.3 If camels were sold please give the following information

| Name of market | Distance to the market from home | Class of animal (code) | Number of animals sold (last 12 months) |
|----------------|----------------------------------|------------------------|-----------------------------------------|
|                |                                  | [_____]                |                                         |
|                |                                  | [_____]                |                                         |
|                |                                  | [_____]                |                                         |
|                |                                  | [_____]                |                                         |
|                |                                  | [_____]                |                                         |

**Codes for class**

- 1 = Calves (less than one year)
- 2 = Young female (pre-breeding)
- 3 = Young male (pre-breeding)
- 4 = Adult female (breeding age)
- 5 = Males (entire)
- 6 = Males (castrated)

E.4 What other management practices do you follow to improve the health and condition of camels before sale? (Indicate all that apply)

1= Deworming, 2= Breeding with improved breeds, 3= Feed supplementation,

4= Others (specify) .....



## F. Camel inflows

F.1 Please tell us about the inflows of camels into your herd during the last 12 months:

| Inflow type (code) | Month | Type of animal (code) | Number of animals | If purchased, where was it purchased (code) |
|--------------------|-------|-----------------------|-------------------|---------------------------------------------|
| [ ]                |       | [ ]                   | [ ]               | [ ]                                         |
| [ ]                |       | [ ]                   | [ ]               | [ ]                                         |
| [ ]                |       | [ ]                   | [ ]               | [ ]                                         |
| [ ]                |       | [ ]                   | [ ]               | [ ]                                         |
| [ ]                |       | [ ]                   | [ ]               | [ ]                                         |
| [ ]                |       | [ ]                   | [ ]               | [ ]                                         |
| [ ]                |       | [ ]                   | [ ]               | [ ]                                         |

### Codes

| Type of inflow           | Type of animal                 |
|--------------------------|--------------------------------|
| 1= Birth                 | 1= Kid/lamb ( <5 months)       |
| 2=Purchase               | 2= Young female (pre-breeding) |
| 3=Gift in                | 3= Adult female (breeding age) |
| 4= Exchange in           | 4= Males (entire)              |
| 5=Others (specify) _____ | 5= Males (castrated)           |
|                          | 6= Old female animals          |
| Where Purchased          |                                |
| 1=Farm gate              |                                |
| 2=Village market         |                                |
| 3=Distant market         |                                |
| 4=Local business centre  |                                |
| 5=Local dip              |                                |
| 7=Auction                |                                |
| 8=Livestock trader       |                                |
| 9=Other (specify) _____  |                                |

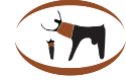

**G. Other assets owned by the household and household composition**

G.1 Do you own the following assets?

| Type of asset          |              | Does the farmer own the asset? 1= Yes 2=No | Number owned |
|------------------------|--------------|--------------------------------------------|--------------|
| Rental buildings       |              |                                            |              |
| Vehicles               | Lorries      |                                            |              |
|                        | Pick-ups     |                                            |              |
|                        | Tractors     |                                            |              |
|                        | Cars         |                                            |              |
|                        | Motor cycles |                                            |              |
| Bicycles               |              |                                            |              |
| Animal pulled carts    |              |                                            |              |
| Radios                 |              |                                            |              |
| TV                     |              |                                            |              |
| Cell phone             |              |                                            |              |
| Other assets (specify) |              |                                            |              |
|                        |              |                                            |              |
|                        |              |                                            |              |
|                        |              |                                            |              |

G.2. Please provide the following information about the members of your household

- i. Number of spouses \_\_\_\_\_
- ii. Number of children \_\_\_\_\_
- iii. Number of siblings \_\_\_\_\_
- iv. Others \_\_\_\_\_

**Thank you**
