# Supplementary material for: Variation of sensitivity of Trypanosoma evansi isolates from Isiolo and Marsabit counties of Kenya to locally available trypanocidal drugs
Source: PubMed Central journal article supplement (PMC9894490; doi:10.1371/journal.pone.0281180), 2023-02-02
Supplement: pone.0281180.s002.pdf [file pone.0281180.s002.pdf]

## S2 Appendix. Clinical signs the camel herders associated with camel surra

| Item                                             | Community orientation |                    |                  |                  |                   |                  |
|--------------------------------------------------|-----------------------|--------------------|------------------|------------------|-------------------|------------------|
|                                                  | Somali<br>(N=111)     | Rendille<br>(N=69) | Gabbra<br>(N=84) | Borana<br>(N=35) | Turkana<br>(N=41) | Total<br>(N=340) |
| <u>Clinical sign mentioned:</u>                  |                       |                    |                  |                  |                   |                  |
| i. Loss of body condition                        | 94 (84.7)             | 65 (94.2)          | 79 (94.0)        | 30 (85.7)        | 40 (97.6)         | 308 (90.6)       |
| ii. Drooping hump                                | 31 (27.9)             | 38 (55.1)          | 46 (54.8)        | 3 (8.6)          | 21 (51.2)         | 139 (40.9)       |
| iii. Inability to walk long distances            | 78 (70.2)             | 49 (70.0)          | 50 (59.2)        | 20 (57.1)        | 25 (61.0)         | 222 (65.3)       |
| iv. Swelling of feet, under belly and eye lids   | 59 (53.1)             | 25 (36.2)          | 20 (23.8)        | 9 (25.7)         | 20 (48.9)         | 133 (39.1)       |
| v. Sitting down frequently                       | 78 (70.2)             | 34 (49.3)          | 33 (39.3)        | 20 (57.1)        | 28 (68.3)         | 193 (56.8)       |
| vi. Rough hair coat                              | 86 (77.5)             | 56 (81.2)          | 70 (83.3)        | 18 (51.4)        | 30 (71.2)         | 260 (76.5)       |
| vii. Lacrimation                                 | 72 (64.9)             | 33 (47.8)          | 29 (35.7)        | 24 (68.6)        | 31 (75.6)         | 189 (55.6)       |
| viii. Shivering                                  | 80 (72.1)             | 30 (43.5)          | 57 (67.9)        | 19 (54.3)        | 9 (22.0)          | 195 (57.4)       |
| ix. Inability to feed well                       | 86 (77.5)             | 43 (62.3)          | 65 (77.4)        | 27 (77.1)        | 26 (63.4)         | 247 (72.6)       |
| x. Diarrhoea                                     | 48 (43.2)             | 34 (49.3)          | 18 (21.4)        | 7 (20.0)         | 14 (34.1)         | 121 (35.6)       |
| xi. Reduced milk production in lactating females | 78 (70.3)             | 37 (53.6)          | 55 (65.5)        | 28 (80.0)        | 27 (65.9)         | 225 (66.2)       |
| xii. Abortion in pregnant females                | 75 (67.6)             | 46 (66.7)          | 55 (65.5)        | 18 (51.4)        | 18 (43.9)         | 212 (65.3)       |
